# Supplementary material for: Protein Coronas on Functionalized Nanoparticles Enable Quantitative and Precise Large-Scale Deep Plasma Proteomics
Source: PubMed Central journal article supplement — bioRxiv. 2023 Aug 29:2023.08.28.555225. Preprint. [Version 1] doi: 10.1101/2023.08.28.555225 (PMC10491250; doi:10.1101/2023.08.28.555225), 2023-08-29
Supplement: media-1.pdf [file media-1.pdf]

## 1 **Supplementary Methods**

### 2 **LC-MS Data Analysis Exploris 480 MS (supplementary information)**

3 The main report with peptide quantifications was used for downstream analysis in R (v4.1). Raw  
4 precursor intensities were log-transformed and replicates of each spiked-in ratio were normalized  
5 using global median log-intensities normalization to correct for the technical variation among  
6 replicates. Ambiguous peptides shared by human and bovine proteins were removed from protein  
7 quantification to avoid mixing the signals from the two organisms. Log-transformed normalized  
8 precursor intensities were aggregated into protein group log-intensities using MaxLFQ (1) from R  
9 package "iq" v1.9.6 (2).

10 We first assessed the precision performance of different workflows by calculating the coefficient  
11 of variation (CV). That is,  $CV = \frac{\sigma}{\mu}$  where  $\sigma$  is the standard deviation, and  $\mu$  is the mean of protein  
12 MaxLFQ intensities across the four replicates of each spike-in ratio.

13 We then evaluated the accuracy of the workflow by estimating how the measured protein fold  
14 changes between pairs of spiked-in ratios deviate from the expected ones. We focused on bovine  
15 proteins since their expected fold changes span from 1.2 to 100 (in comparison to 1.01–2 for human  
16 proteins). The spiked-in ratios for bovine proteins (1, 0.5, 0.4, 0.3333, 0.1, 0.01; samples with no  
17 bovine proteins were excluded) produce 15 pairwise comparisons with the following expected fold  
18 changes: 1/0.5 (2), 1/0.4 (2.5), 1/0.3333 (3), 1/0.1 (10), 1/0.01(100), 0.5/0.4 (1.25), 0.5/0.3333  
19 (1.5), 0.5/0.1 (5), 0.5/0.01 (50), 0.4/0.3333 (1.2), 0.4/0.1 (4), 0.4/0.01 (40), 0.3333/0.1 (3.33),  
20 0.3333/0.01 (33.33), and 0.1/0.01 (10).

21

22 Compression of dynamic range at the NP-protein interface can lead to systematic compression or  
 23 inflation of the measured fold changes. To further improve quantification accuracy, one can correct  
 24 these systematic deviations. We performed a linear fit between the expected and measured log  
 25 fold-changes using the least square method for each precursor:

$$26 \quad \log_2 \widetilde{FC}_i \sim \beta \log_2 FC_i + \varepsilon_i, \quad i = 1 \dots 15,$$

27 where  $\log_2 FC_i$  and  $\log_2 \widetilde{FC}_i$  represent the expected and measured  $\log_2$  fold changes of the  $i$ -th  
 28 comparison, respectively. The estimated linear fit parameter  $\hat{\beta}$  was then used to calculate the  
 29 corrected  $\log_2$  fold change:

$$30 \quad \log_2 \widehat{FC}_i = \frac{\log_2 \widetilde{FC}_i}{\hat{\beta}}$$

31 The errors between the expected and either measured or corrected fold-changes were calculated as  
 32  $\frac{1}{15} \sum_i |\log_2 FC_i - \log_2 \widetilde{FC}_i|$  and  $\frac{1}{15} \sum_i |\log_2 FC_i - \log_2 \widehat{FC}_i|$ , respectively (**Supplementary Figure**  
 33 **5**).

34 Finally, we evaluated the quality of protein intensities by matrix-matched calibration curve  
 35 approach (3). For each analyte, we estimated the observed noise floor and linear intensity response  
 36 to concentration by curve fitting. Limits of detection (LoD) and limits of quantification (LoQ)  
 37 were estimated as the "spike-in ratio" (percentage of undiluted abundance) above which the  
 38 predicted intensity response exceeds the observed noise floor by two standard deviations, and the  
 39 concentration above which the coefficient of variation (CV) of intensity response (estimated by  
 40 bootstrapping) falls below 20%, respectively. We required the background noise to be estimated  
 41 from at least one concentration point (4 replicates), and the linear range to be estimated from at  
 42 least two concentration points (8 replicates). To account for large/small steps at the extremes of

43 our dilution range we employed a modified method that initially estimates noise from the lowest  
 44 two concentrations and linear response by regression on the remaining points. This initial fit was  
 45 refined by subsequent curve fitting and bootstrapping steps that matched the published  
 46 implementation from (3).

#### 47 **Cohort Study (supplementary information)**

48 The sample size that allows for detecting protein regulation at a given threshold ( $\log_2 FC$ ) with  
 49 given power (sensitivity)  $\beta$ , while also controlling the false discovery rate (FDR) (4,5) was  
 50 calculated as:

$$51 \quad n = \frac{2(z(1-\alpha/2)+z(\beta))^2}{\left(\frac{\log_2 FC}{\sigma}\right)^2}, \text{ where } \alpha = \frac{\beta FDR}{1+\pi_0(1-FDR)},$$

52  $\sigma$  is the median standard deviation of  $\log_2$  intensities for all proteins,  $\pi_0$  is the ratio of non-  
 53 regulated to regulated proteins in the data ( $\pi_0 = 99$  was used), and  $z(x)$  is the inverse cumulative  
 54 density function of the standard normal distribution. We calculated the required sample size once  
 55 without adjusting for known batch effects and setting  $\sigma$  to the standard deviation of median  
 56 normalized intensities for proteins present in 3 or more NP-specific samples, and once adjusting  
 57 for known batch effects such as plate and LC-MS instrument using the residual variance from the  
 58 following linear mixed model (in lme4 notation):

$$59 \quad \textit{Abundance} \sim 1 + (1|\textit{Plate}) + (1|\textit{Instrument}).$$

60

#### 61 **Supplementary Figures**

62

Supplementary Information Quantitative Nanoparticle-based Proteomics

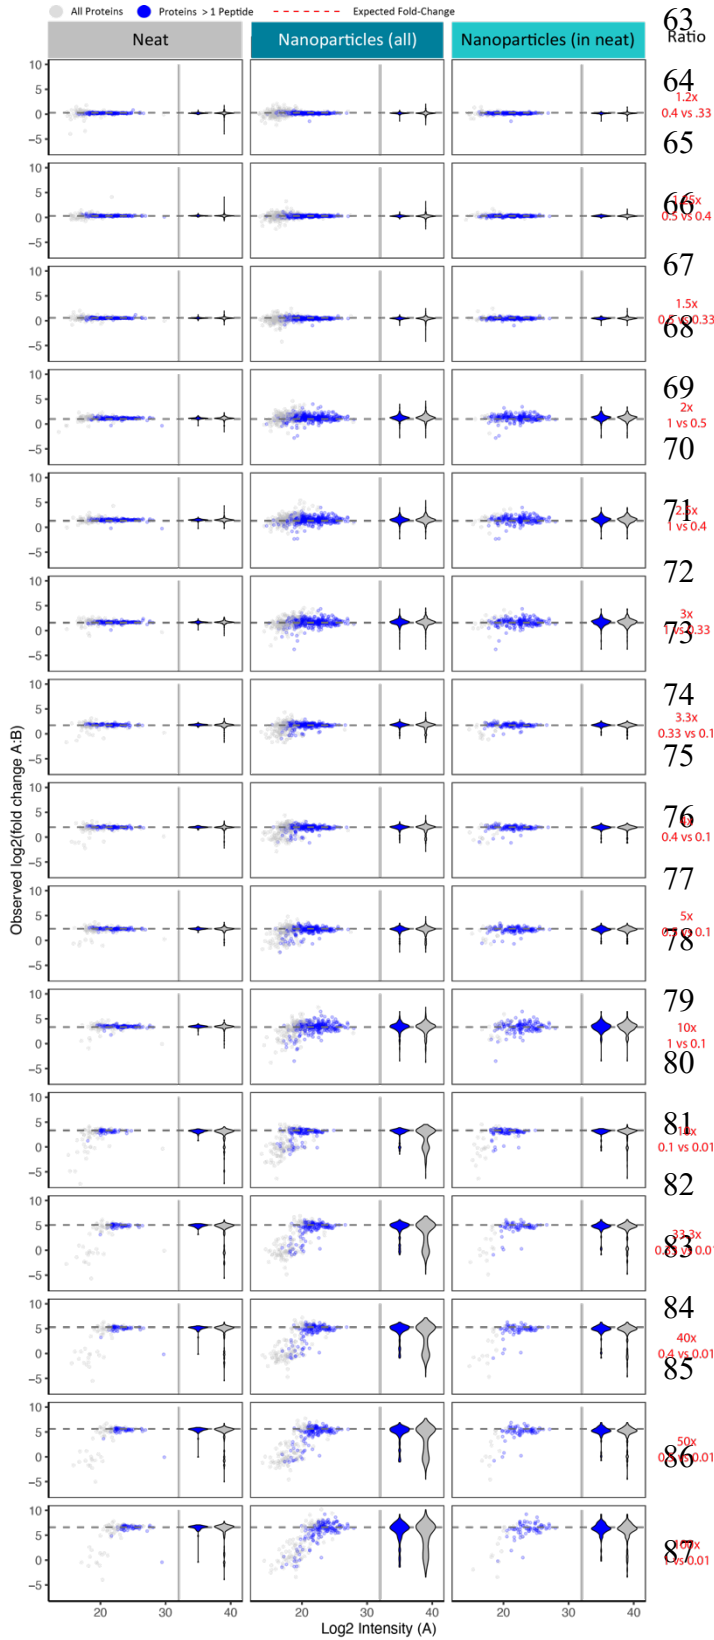

63 Ratio  
 64 1.2x  
 0.4 vs 0.33  
 65  
 66 1.6x  
 0.5 vs 0.4  
 67  
 68 1.5x  
 0.5 vs 0.33  
 69 2x  
 1 vs 0.5  
 70  
 71 2.6x  
 1 vs 0.4  
 72  
 73 3x  
 1 vs 0.33  
 74 3.3x  
 0.33 vs 0.1  
 75  
 76 0.4 vs 0.1  
 77  
 78 5x  
 0.1 vs 0.1  
 79 10x  
 1 vs 0.1  
 80  
 81 14x  
 0.1 vs 0.01  
 82  
 83 33.3x  
 0.33 vs 0.01  
 84 40x  
 0.4 vs 0.01  
 85  
 86 50x  
 0.5 vs 0.01  
 87 77x  
 0.5 vs 0.01

**Supplementary Figure 1. Protein Quantification Accuracy of Neat Plasma Digestion and Proteograph Workflows.** Spiked-in ratios for bovine proteins (1, 0.5, 0.4, 0.3333, 0.1, 0.01, and 0), producing 15 pairwise comparisons for small (A), medium (B), and large (C) fold changes. We skipped the ratio 0 since it had no bovine proteins. The pairwise comparisons were labeled as the expected fold-changes of the bovine proteins, i.e., 1 vs 0.5(2), 1 vs 0.4(2.5), 1 vs 0.3333(3), 1 vs 0.1(10), 1 vs 0.01(100), 0.5 vs 0.4(1.25), 0.5 vs 0.3333(1.5), 0.5 vs 0.1(5), 0.5 vs 0.01(50), 0.4 vs 0.3333(1.2), 0.4 vs 0.1(4), 0.4 vs 0.01(40), 0.3333 vs 0.1(3.33), 0.3333 vs 0.01(33.33), and 0.1 vs 0.01(10). X-axis denotes the log<sub>2</sub> intensities. Y-axis is denoting fold changes of bovine proteins with dotted line indicating the expected fold change. For each comparison (neat, NP workflow all, shared), we illustrate all proteins as well (grey) as well as those quantified with more than 1 peptide (blue) as a scatter plot as well as violin plot. Data shown here are based on IP10.

## Supplementary Information Quantitative Nanoparticle-based Proteomics

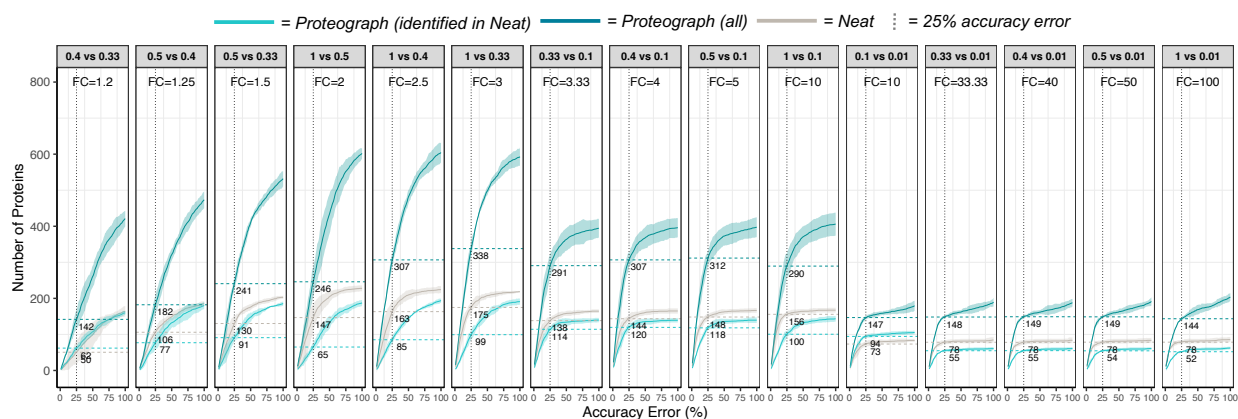

88

89 **Supplementary Figure 2. Quantitative Accuracy Performance of Proteograph Workflow in Comparison to**  
 90 **Neat Digestion Workflow.** Each panel represents one fold-change of bovine proteins. X-axis is the % accuracy error,  
 91 i.e., the difference between the observed and expected fold-change divided by the expected fold-change, and Y-axis  
 92 is the number of bovine proteins identified at a given accuracy threshold. The horizontal dashed lines indicate bovine  
 93 proteins reported at 25% threshold. Proteograph workflow with proteins identified in neat workflow is colored in light  
 94 teal, Proteograph workflow with all proteins is colored in dark teal, and neat digestion workflow is colored in grey.  
 95 Proteograph workflow with all proteins has demonstrated higher protein identification than neat digestion workflow  
 96 with certain accuracy. Data shown here are based on IP10.

97

Supplementary Information Quantitative Nanoparticle-based Proteomics

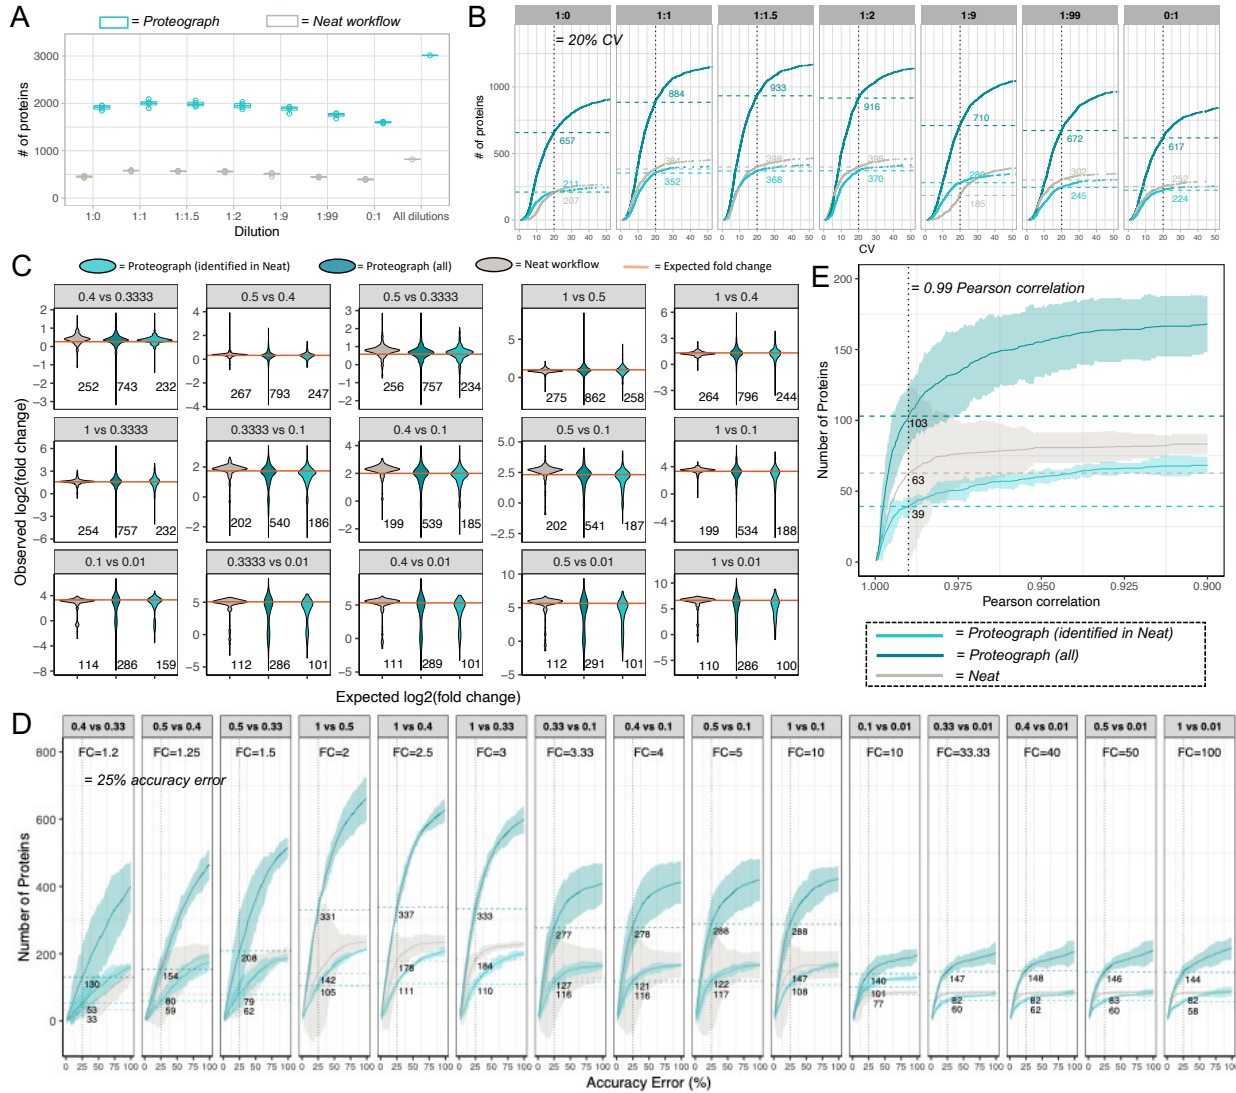

98

99 **Supplementary Figure 3. Quantification Performance of Neat and Proteograph Workflows for Another**

100 **Human Plasma Sample PC6.** All the data processing and statistical analysis steps are the same as those on the

101 previous IP10 sample. (A) The number of proteins quantified at each ratio. Proteograph workflow is colored in teal

102 and neat workflow is colored in grey. (B) Number of Proteins Identified at a given CV Threshold for each Spiked-in

103 ratio. X-axis is the CV calculated across four replicates, and the Y-axis is the number of proteins with a CV lower

104 than the given threshold. NP-workflow with proteins identified in neat workflow is colored in light teal, Proteograph

105 workflow with all proteins is colored in dark teal, and neat workflow is colored in grey. Only proteins quantified in

106 all four replicates are counted. (C) Fold change accuracy of Neat and NP- Workflows. X-axis is the 15 comparisons

107 and y-axis is observed fold changes. The orange dots connected by the orange line, as well as the orange numbers,

108 indicate the expected fold changes of bovine proteins. The distribution of observed fold changes is shown by each box  
 109 plot. The barplots at the top panel show the corresponding number of proteins summarized by each box. (D) Number  
 110 of Proteins Identified at a given accuracy error for each expected fold change. Each panel represents one fold change.  
 111 X-axis is the % accuracy error, i.e., the difference between the observed and expected protein fold change divided by  
 112 the expected fold change, and Y-axis is the number of proteins identified at a given accuracy threshold. The horizontal  
 113 dashed lines indicate proteins reported at 25% threshold. Proteograph workflow with all proteins has demonstrated  
 114 higher protein identification than neat digestion workflow with certain accuracy.

115

116

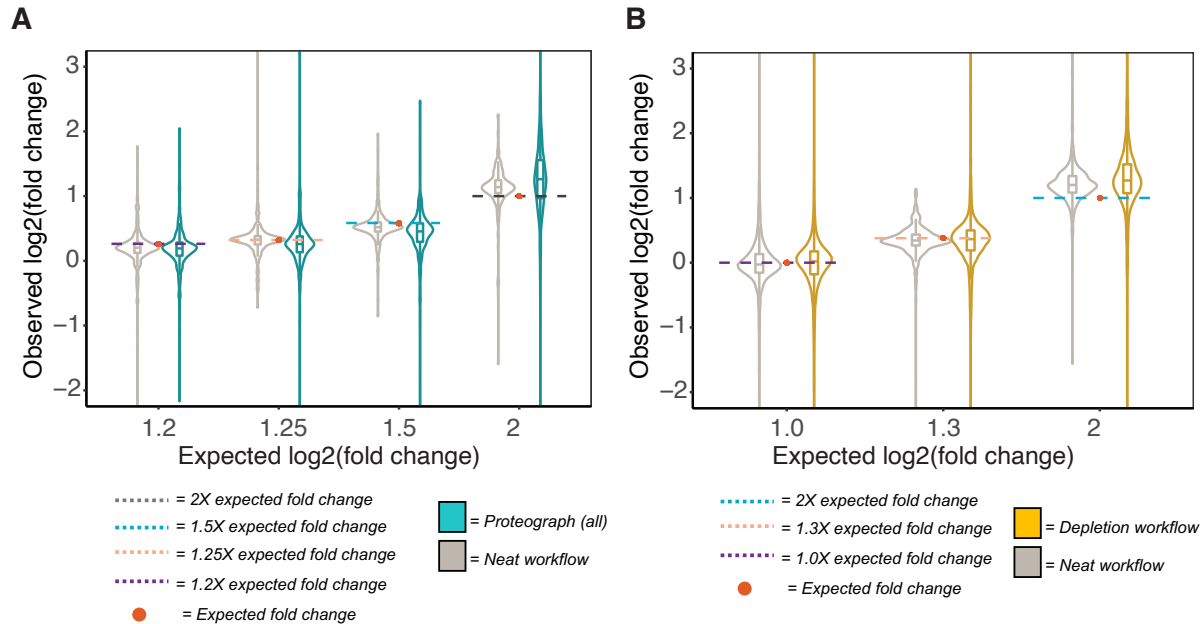

117

118 **Supplementary Figure 4. Quantification Accuracy Across Lower Fold Change Ranges.** (A) Proteograph  
 119 workflow quantitation accuracy across 1.2-2 fold-change. Quantification data produced by NP-workflow shows  
 120 comparable accuracy with those from neat workflow at low fold change of 1.2-2 fold. Data shown here are based on  
 121 IP10. (B) The performance of depletion workflow is compared with neat digestion workflow here across similar low  
 122 fold changes of 1.0-2 fold-change (6). Although this data is generated on different plasma sample and LC-MS  
 123 workflow, overall we observe similar accuracies with Proteograph workflow.

124

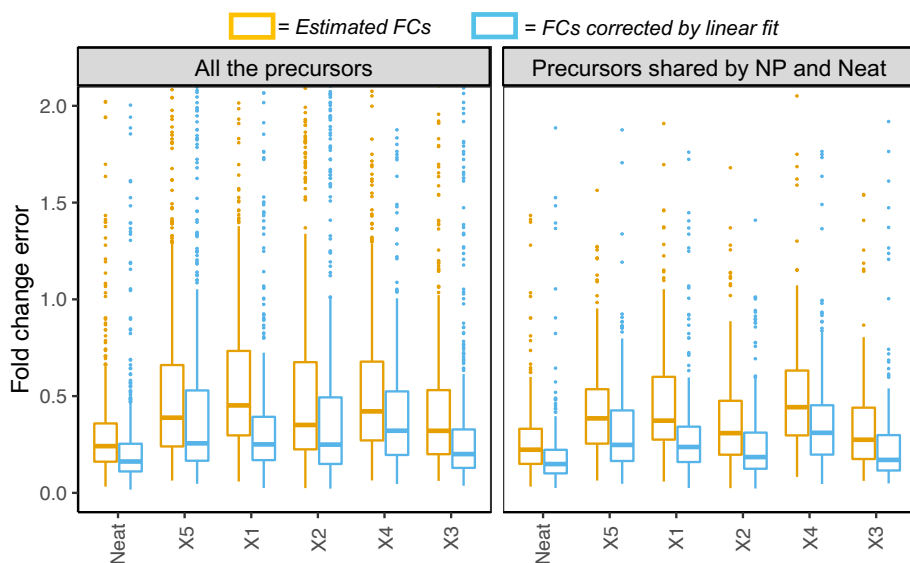

125

126 **Supplementary Figure 5. Quantification Accuracy Correcting for Systematic Shifts in Quantification.** For each  
127 precursor, we performed a linear fit correction between the measured log FC and the expected log FC of bovine  
128 precursors. The fold change error (y-axis) was then calculated as the mean absolute difference between the measured  
129 or corrected log FCs and the expected log FCs. The x-axis is the Neat workflow and the 5 NPs used by Proteograph  
130 workflow. After correction by linear fit, the fold change error can be significantly reduced.

131

132



133 **Supplementary References**

134

135 1. Cox J, Hein MY, Luber CA, Paron I, Nagaraj N, Mann M. Accurate  
136 Proteome-wide Label-free Quantification by Delayed Normalization and  
137 Maximal Peptide Ratio Extraction, Termed MaxLFQ\*. *Mol Cell*  
138 *Proteomics*. 2014;13:2513–26.

139 2. Pham TV, Henneman AA, Jimenez CR. iq: an R package to estimate  
140 relative protein abundances from ion quantification in DIA-MS-based  
141 proteomics. *Bioinformatics*. 2020;36:2611–3.

142 3. Pino LK, Searle BC, Yang H-Y, Hoofnagle AN, Noble WS, MacCoss MJ.  
143 Matrix-Matched Calibration Curves for Assessing Analytical Figures of  
144 Merit in Quantitative Proteomics. *J Proteome Res*. 2020;19:1147–53.

145 4. Jung S-H. Sample size for FDR-control in microarray data analysis.  
146 *Bioinformatics*. 2005;21:3097–104.

147 5. Lachin JM. Introduction to sample size determination and power  
148 analysis for clinical trials. *Control Clin Trials*. 1981;2:93–113.

149 6. Tognetti M, Sklodowski K, Müller S, Kamber D, Muntel J, Bruderer R,  
150 et al. Biomarker Candidates for Tumors Identified from Deep-Profiled  
151 Plasma Stem Predominantly from the Low Abundant Area. *J Proteome*  
152 *Res*. 2022;21:1718–35.

153

154
